# Supplementary material
Source: publisher site journal article supplement (https://www.dovepress.com/article/584766)
Supplement: Supplementary file 1 [file 584766%20Revised%20Supplementary%20Materials.docx]

## **Supplementary Section 1.1. Overview of Neuroimaging**

## **Techniques Included in the Review**

**Panel 1. Overview of neuroimaging techniques included in the review.**

**Positron emission tomography (PET)** is an invasive technique where a radioactive tracer is injected to measure distinct brain physiological functions, including *blood flow/oxygen consumption*, *metabolism* (eg, glucose), and *neurotransmission* (eg, dopamine).31

**Functional neuroimaging (fMRI)** is a non-invasive neuroimaging technique that measures brain function (eg, *activity*, *connectivity*) via blood oxygen level-dependent (BOLD) signal (an indirect proxy of neuronal activity)during distinct fMRI tasks.32 The fMRI tasks may include ‘rest’, whereby individuals do not perform cognitively challenging tasks and usually look at a fixation cross or keep their eyes closed. Else, cognitively engaging fMRI tasks exist that assess various cognitive processes, such as reward processing, inhibition, learning and memory.32 Resting state fMRI measures resting state functional connectivity, which indexes the temporal correlation of the spontaneous BOLD signals between spatially distinct brain regions.35 Meanwhile, task-based fMRI can measure brain activity, connectivity and other metrics of brain function (eg, global efficiency).

**T1-weighted MR imaging** is a non-invasive MRI technique that can visualize *neuroanatomy* in 3D and parcellate the brain into tissue types (ie, grey matter, white matter, cerebrospinal fluid). T1-weighted images can be used to quantify neuroanatomical measures relative to the morphometry of distinct tissue types (eg, volume, thickness, density) using various methodological approaches, including but not limited to hypothesis-driven Region-of-Interest (ROI) focused on *a-priori* areas and exploratory whole-brain voxel-based morphometry (VBM) or vertex-based morphometry (ie, Freesurfer).32

**Diffusion weighted imaging** (DWI) is a non-invasive MRI technique that assesses the integrity of *white matter microstructure* by measuring the diffusion/direction of water molecules within white matter,33 whereby diffusion indicates the natural process where water particles move from an area of high concentration to an area of low concentration. Traditionally, DWI generates several metrics to measure the diffusion of water in a given direction (eg, *fractional anisotropy*) or in all directions (eg, *mean diffusivity*).36 Additional DWI methods have been recently developed and they generate distinct metrics. One such example is *Fixel-Based Analysis*, which examines the microscopic *fiber* *density* and macroscopic *fiber cross-section* of white matter tracts.37,38 Another example is *connectome*-based approaches that examine the connectivity between white matter fibers.37,38

**Magnetic resonance spectroscopy (MRS)** is a non-invasive MRI technique that measures various *neurochemicals*, such as neuronal (*N-acetyl aspartate [NAA]*) and glial cell (ie, myoinositol) *metabolite markers*, neurotransmitters (eg, glutamate) and other *neurochemicals* (eg, adenosine triphosphate, phosphocreatine).34
